# Supplementary material
Source: PubMed Central journal article supplement (PMC9033225)
Supplement: mmc1.pdf [file mmc1.pdf]

# THE LANCET

## Respiratory Medicine

### Supplementary appendix

This appendix formed part of the original submission and has been peer reviewed. We post it as supplied by the authors.

Supplement to: Tartof SY, Slezak JM, Puzniak L, et al. Durability of BNT162b2 vaccine against hospital and emergency department admissions due to the omicron and delta variants in a large health system in the USA: a test-negative case-control study. *Lancet Respir Med* 2022; published online April 22. [https://doi.org/10.1016/S2213-2600\(22\)00101-1](https://doi.org/10.1016/S2213-2600(22)00101-1).

**Supplementary Table 1.** Acute Respiratory Infection Codes and frequency in study population, Dec 1, 2021 to Feb 06, 2022

|        |                                                              | Frequency |
|--------|--------------------------------------------------------------|-----------|
|        |                                                              | N         |
| A48.1  | LEGIONNAIRES' DISEASE                                        | 6         |
| B34.2  | CORONAVIRUS INFECTION, UNSPECIFIED                           | 6         |
| B44.0  | INVASIVE PULMONARY ASPERGILLOSIS                             | 1         |
| B97.29 | OTH CORONAVIRUS AS THE CAUSE OF DISEASES CLASSD ELSWHR       | 5         |
| J00    | ACUTE NASOPHARYNGITIS (COMMON COLD)                          | 8         |
| J01.00 | ACUTE MAXILLARY SINUSITIS, UNSPECIFIED                       | 11        |
| J01.10 | ACUTE FRONTAL SINUSITIS, UNSPECIFIED                         | 2         |
| J01.20 | ACUTE ETHMOIDAL SINUSITIS, UNSPECIFIED                       | 1         |
| J01.30 | ACUTE SPHENOIDAL SINUSITIS, UNSPECIFIED                      | 1         |
| J01.40 | ACUTE PANSINUSITIS, UNSPECIFIED                              | 2         |
| J01.80 | OTHER ACUTE SINUSITIS                                        | 4         |
| J01.90 | ACUTE SINUSITIS, UNSPECIFIED                                 | 29        |
| J02.0  | STREPTOCOCCAL PHARYNGITIS                                    | 47        |
| J02.8  | ACUTE PHARYNGITIS DUE TO OTHER SPECIFIED ORGANISMS           | 34        |
| J02.9  | ACUTE PHARYNGITIS, UNSPECIFIED                               | 892       |
| J03.00 | ACUTE STREPTOCOCCAL TONSILLITIS, UNSPECIFIED                 | 3         |
| J03.90 | ACUTE TONSILLITIS, UNSPECIFIED                               | 32        |
| J04.0  | ACUTE LARYNGITIS                                             | 13        |
| J04.10 | ACUTE TRACHEITIS WITHOUT OBSTRUCTION                         | 1         |
| J05.0  | ACUTE OBSTRUCTIVE LARYNGITIS (CROUP)                         | 53        |
| J05.10 | ACUTE EPIGLOTTITIS WITHOUT OBSTRUCTION                       | 2         |
| J06.0  | ACUTE LARYNGOPHARYNGITIS                                     | 1         |
| J06.9  | ACUTE UPPER RESPIRATORY INFECTION, UNSPECIFIED               | 826       |
| J09.X1 | INFLUENZA DUE TO IDENT NOVEL INFLUENZA A VIRUS W PNEUMONIA   | 2         |
| J09.X2 | FLU DUE TO IDENT NOVEL INFLUENZA A VIRUS W OTH RESP MANIFEST | 2         |
| J10.00 | FLU DUE TO OTH IDENT FLU VIRUS W UNSP TYPE OF PNEUMONIA      | 7         |
| J10.01 | FLU DUE TO OTH IDENT FLU VIRUS W SAME OTH IDENT FLU VIRUS PN | 1         |
| J10.08 | INFLUENZA DUE TO OTH IDENT INFLUENZA VIRUS W OTH PNEUMONIA   | 5         |
| J10.1  | FLU DUE TO OTH IDENT INFLUENZA VIRUS W OTH RESP MANIFEST     | 79        |
| J10.2  | INFLUENZA DUE TO OTH IDENT INFLUENZA VIRUS W GI MANIFEST     | 1         |
| J11.00 | FLU DUE TO UNIDENTIFIED FLU VIRUS W UNSP TYPE OF PNEUMONIA   | 5         |
| J11.08 | FLU DUE TO UNIDENTIFIED FLU VIRUS W SPECIFIED PNEUMONIA      | 1         |
| J11.1  | FLU DUE TO UNIDENTIFIED INFLUENZA VIRUS W OTH RESP MANIFEST  | 186       |
| J12.1  | RESPIRATORY SYNCYTIAL VIRUS PNEUMONIA                        | 17        |
| J12.2  | PARAINFLUENZA VIRUS PNEUMONIA                                | 1         |
| J12.3  | HUMAN METAPNEUMOVIRUS PNEUMONIA                              | 2         |
| J12.81 | PNEUMONIA DUE TO SARS-ASSOCIATED CORONAVIRUS                 | 1         |
| J12.82 | PNEUMONIA DUE TO CORONAVIRUS DISEASE 2019                    | 2,488     |

|         |                                                              |       |
|---------|--------------------------------------------------------------|-------|
| J12.89  | OTHER VIRAL PNEUMONIA                                        | 28    |
| J12.9   | VIRAL PNEUMONIA, UNSPECIFIED                                 | 14    |
| J13     | PNEUMONIA DUE TO STREPTOCOCCUS PNEUMONIAE                    | 10    |
| J14     | PNEUMONIA DUE TO HEMOPHILUS INFLUENZAE                       | 2     |
| J15.0   | PNEUMONIA DUE TO KLEBSIELLA PNEUMONIAE                       | 5     |
| J15.1   | PNEUMONIA DUE TO PSEUDOMONAS                                 | 9     |
| J15.20  | PNEUMONIA DUE TO STAPHYLOCOCCUS, UNSPECIFIED                 | 1     |
| J15.211 | PNEUMONIA DUE TO METHICILLIN SUSCEP STAPH                    | 7     |
| J15.212 | PNEUMONIA DUE TO METHICILLIN RESISTANT STAPHYLOCOCCUS AUREUS | 2     |
| J15.4   | PNEUMONIA DUE TO OTHER STREPTOCOCCI                          | 10    |
| J15.5   | PNEUMONIA DUE TO ESCHERICHIA COLI                            | 2     |
| J15.6   | PNEUMONIA DUE TO OTHER AEROBIC GRAM-NEGATIVE BACTERIA        | 1     |
| J15.7   | PNEUMONIA DUE TO MYCOPLASMA PNEUMONIAE                       | 1     |
| J15.8   | PNEUMONIA DUE TO OTHER SPECIFIED BACTERIA                    | 3     |
| J15.9   | UNSPECIFIED BACTERIAL PNEUMONIA                              | 75    |
| J16.8   | PNEUMONIA DUE TO OTHER SPECIFIED INFECTIOUS ORGANISMS        | 5     |
| J18.0   | BRONCHOPNEUMONIA, UNSPECIFIED ORGANISM                       | 8     |
| J18.1   | LOBAR PNEUMONIA, UNSPECIFIED ORGANISM                        | 47    |
| J18.8   | OTHER PNEUMONIA, UNSPECIFIED ORGANISM                        | 17    |
| J18.9   | PNEUMONIA, UNSPECIFIED ORGANISM                              | 925   |
| J20.2   | ACUTE BRONCHITIS DUE TO STREPTOCOCCUS                        | 1     |
| J20.5   | ACUTE BRONCHITIS DUE TO RESPIRATORY SYNCYTIAL VIRUS          | 7     |
| J20.6   | ACUTE BRONCHITIS DUE TO RHINOVIRUS                           | 3     |
| J20.8   | ACUTE BRONCHITIS DUE TO OTHER SPECIFIED ORGANISMS            | 163   |
| J20.9   | ACUTE BRONCHITIS, UNSPECIFIED                                | 88    |
| J22     | UNSPECIFIED ACUTE LOWER RESPIRATORY INFECTION                | 11    |
| J39.0   | RETROPHARYNGEAL AND PARAPHARYNGEAL ABSCESS                   | 4     |
| J39.1   | OTHER ABSCESS OF PHARYNX                                     | 1     |
| J39.2   | OTHER DISEASES OF PHARYNX                                    | 11    |
| J39.8   | OTHER SPECIFIED DISEASES OF UPPER RESPIRATORY TRACT          | 7     |
| J80     | ACUTE RESPIRATORY DISTRESS SYNDROME                          | 131   |
| J96.00  | ACUTE RESPIRATORY FAILURE, UNSP W HYPOXIA OR HYPERCAPNIA     | 131   |
| J96.01  | ACUTE RESPIRATORY FAILURE WITH HYPOXIA                       | 1,760 |
| J96.02  | ACUTE RESPIRATORY FAILURE WITH HYPERCAPNIA                   | 45    |
| J96.10  | CHRONIC RESPIRATORY FAILURE, UNSP W HYPOXIA OR HYPERCAPNIA   | 83    |
| J96.11  | CHRONIC RESPIRATORY FAILURE WITH HYPOXIA                     | 149   |
| J96.12  | CHRONIC RESPIRATORY FAILURE WITH HYPERCAPNIA                 | 29    |
| J96.20  | ACUTE AND CHR RESP FAILURE, UNSP W HYPOXIA OR HYPERCAPNIA    | 12    |
| J96.21  | ACUTE AND CHRONIC RESPIRATORY FAILURE WITH HYPOXIA           | 203   |
| J96.22  | ACUTE AND CHRONIC RESPIRATORY FAILURE WITH HYPERCAPNIA       | 49    |

|        |                                                          |        |
|--------|----------------------------------------------------------|--------|
| J96.90 | RESPIRATORY FAILURE, UNSP, UNSP W HYPOXIA OR HYPERCAPNIA | 52     |
| J96.91 | RESPIRATORY FAILURE, UNSPECIFIED WITH HYPOXIA            | 38     |
| J96.92 | RESPIRATORY FAILURE, UNSPECIFIED WITH HYPERCAPNIA        | 6      |
| M35.81 | MULTISYSTEM INFLAMATORY SYNDROME                         | 3      |
| M35.89 | OTHER SPECIFIED SYSTEMIC INVOLVMENT OF CONNECTIVE TISSUE | 1      |
| R05.1  | ACUTE COUGH                                              | 25     |
| R05.3  | CHRONIC COUGH                                            | 112    |
| R05.4  | COUGH SYNCOPE                                            | 6      |
| R05.8  | OTHER SPECIFIED COUGH                                    | 45     |
| R05.9  | COUGH, UNSPECIFIED                                       | 1,389  |
| R09.2  | RESPIRATORY ARREST                                       | 4      |
| R50.9  | FEVER, UNSPECIFIED                                       | 737    |
| U07.1  | COVID-19                                                 | 10,342 |
| All    |                                                          | 21,598 |

**Supplementary Table 2. Proportion of specimens identified as S-gene Target Failure on the ThermoFisher TaqPath COVID-19 Combo Kit, by date**

| Date       | Total # of samples | S gene dropout (SGTF) | Total # of positive samples | % S gene dropout |
|------------|--------------------|-----------------------|-----------------------------|------------------|
| 12/1/2021  | 14516              | 12                    | 706                         | 1.7              |
| 12/2/2021  | 12864              | 17                    | 634                         | 2.68             |
| 12/3/2021  | 13583              | 23                    | 1330                        | 1.73             |
| 12/4/2021  | 13266              | 20                    | 652                         | 3.07             |
| 12/5/2021  | 9570               | 13                    | 421                         | 3.09             |
| 12/6/2021  | 4445               | 8                     | 648                         | 1.23             |
| 12/7/2021  | 12247              | 9                     | 632                         | 1.42             |
| 12/8/2021  | 14,664             | 16                    | 590                         | 2.7              |
| 12/9/2021  | 15,416             | 33                    | 691                         | 4.8              |
| 12/10/2021 | 13,160             | 38                    | 581                         | 6.5              |
| 12/11/2021 | 12,032             | 35                    | 594                         | 5.9              |
| 12/12/2021 | 9024               | 21                    | 383                         | 5.5              |
| 12/13/2021 | 7144               | 25                    | 263                         | 9.5              |
| 12/14/2021 | 13,536             | 114                   | 746                         | 15.3             |
| 12/15/2021 | 13,536             | 183                   | 637                         | 28.7             |
| 12/16/2021 | 14,664             | 351                   | 895                         | 39.2             |
| 12/17/2021 | 14,664             | 385                   | 913                         | 42.2             |
| 12/18/2021 | 14,288             | 501                   | 1031                        | 48.6             |
| 12/19/2021 | 11,656             | 444                   | 844                         | 52.6             |
| 12/20/2021 | 7777               | 428                   | 674                         | 63.5             |
| 12/21/2021 | 15,284             | 1218                  | 1766                        | 69.0             |
| 12/22/2021 | 19,033             | 1952                  | 2407                        | 81.1             |

|            |        |        |        |       |
|------------|--------|--------|--------|-------|
| 12/23/2021 | 18,569 | 2017   | 2459   | 82.0  |
| 12/24/2021 | 22,619 | 2769   | 3301   | 83.9  |
| 12/25/2021 | 15,567 | 2226   | 2547   | 87.4  |
| 12/26/2021 | 17,212 | 2341   | 2674   | 87.6  |
| 12/27/2021 | 12,103 | 2498   | 2723   | 91.7  |
| 12/28/2021 | 17,158 | 4717   | 5098   | 92.5  |
| 12/29/2021 | 25,706 | 6679   | 7563   | 88.3  |
| 12/30/2021 | 29,277 | 8364   | 8808   | 95.0  |
| 12/31/2021 | 21,374 | 5885   | 6254   | 94.1  |
| 1/1/2022   | 28,990 | 8532   | 9059   | 94.2  |
| 1/2/2022   | 19,711 | 5184   | 5575   | 93.0  |
| 1/3/2022   | 33,158 | 8280   | 8881   | 93.2  |
| 1/4/2022   | 35,157 | 10,499 | 11,007 | 95.4  |
| 1/5/2022   | 33,088 | 10,903 | 11,830 | 92.2  |
| 1/6/2022   | 33,549 | 11,451 | 11,922 | 96.1  |
| 1/7/2022   | 35,018 | 11,991 | 12,466 | 96.2  |
| 1/8/2022   | 28,269 | 8838   | 9240   | 95.7  |
| 1/9/2022   | 36,071 | 12,290 | 12,645 | 97.2  |
| 1/10/2022  | 29,457 | 9452   | 9704   | 97.4  |
| 1/11/2022  | 42,888 | 13,176 | 13,542 | 97.3  |
| 1/12/2022  | 31297  | 9319   | 9579   | 97.29 |
| 1/13/2022  | 35933  | 11946  | 12208  | 97.85 |
| 1/14/2022  | 38704  | 14158  | 14424  | 98.16 |
| 1/15/2022  | 40259  | 13832  | 14100  | 98.1  |
| 1/16/2022  | 40570  | 13747  | 14051  | 97.84 |
| 1/17/2022  | 33631  | 10111  | 10350  | 97.69 |
| 1/18/2022  | 33385  | 11020  | 11202  | 98.38 |
| 1/19/2022  | 32169  | 10710  | 10930  | 97.99 |
| 1/20/2022  | 24122  | 7778   | 7901   | 98.44 |
| 1/21/2022  | 23180  | 6744   | 6916   | 97.51 |
| 1/22/2022  | 22790  | 6484   | 6635   | 97.72 |
| 1/23/2022  | 16574  | 3974   | 4019   | 98.88 |
| 1/24/2022  | 10614  | 2781   | 2808   | 99.04 |
| 1/25/2022  | 19123  | 4810   | 5327   | 90.29 |
| 1/26/2022  | 17903  | 4229   | 5227   | 80.91 |
| 1/27/2022  | 19424  | 4588   | 5118   | 89.64 |
| 1/28/2022  | 15003  | 3267   | 3296   | 99.12 |
| 1/29/2022  | 13940  | 2890   | 2918   | 99.04 |
| 1/30/2022  | 10688  | 2025   | 2066   | 98.02 |
| 1/31/2022  | 7256   | 1458   | 1470   | 99.18 |
| 2/1/2022   | 12943  | 2291   | 3186   | 71.91 |
| 2/2/2022   | 13806  | 2300   | 2337   | 98.42 |

**Supplementary Tables 3a & 3b. Adjusted (3a) and unadjusted (3b) vaccine effectiveness of Pfizer mRNA COVID-19 vaccine BNT162b2 against hospital and emergency department among individuals with acute respiratory infection, Dec 1, 2021 through Feb 06, 2022**

**a) Adjusted Estimates**

| <b>BNT162b2 effectiveness</b>                                       | <b>Delta</b>                                           | <b>Omicron</b> |
|---------------------------------------------------------------------|--------------------------------------------------------|----------------|
|                                                                     | <i>Vaccine effectiveness (95% confidence interval)</i> |                |
| <i>Hospital admission</i>                                           |                                                        |                |
| 2 doses overall                                                     | 76 (69- 82)                                            | 62 (53- 69)    |
| 2 doses <3 months ago                                               | 78 (55- 89)                                            | 68 (48- 80)    |
| 2 doses 3 to <6 months ago                                          | 87 (76- 93)                                            | 68 (53- 78)    |
| 2 doses 6 to <9 months ago                                          | 72 (60- 81)                                            | 72 (63- 79)    |
| 2 doses ≥9 months ago                                               | 73 (58- 83)                                            | 41 (21- 55)    |
|                                                                     |                                                        |                |
| 3 doses overall                                                     | 87 (81- 92)                                            | 82 (77- 87)    |
| 3 doses <3 months ago                                               | 89 (83- 93)                                            | 85 (80- 89)    |
| 3 doses ≥3 months ago                                               | 71 (40- 86)                                            | 55 (28- 71)    |
|                                                                     |                                                        |                |
| <i>Emergency department admission without admission to hospital</i> |                                                        |                |
| 2 doses overall                                                     | 61 (55- 66)                                            | 47 (40- 54)    |
| 2 doses <3 months ago                                               | 78 (69- 85)                                            | 64 (51- 73)    |
| 2 doses 3 to <6 months ago                                          | 59 (48- 68)                                            | 47 (34- 57)    |
| 2 doses 6 to <9 months ago                                          | 59 (51- 66)                                            | 51 (43- 59)    |
| 2 doses ≥9 months ago                                               | 57 (45- 66)                                            | 31 (16- 43)    |
|                                                                     |                                                        |                |
| 3 doses overall                                                     | 83 (79- 86)                                            | 75 (70- 79)    |
| 3 doses <3 months ago                                               | 84 (80- 87)                                            | 77 (72- 81)    |
| 3 doses ≥3 months ago                                               | 72 (58- 82)                                            | 53 (36- 66)    |

\*adjusted for age, sex, race/ethnicity, BMI, Charlson comorbidity index, prior SARS-CoV-2 infection, prior influenza vaccination, prior pneumococcal vaccination

**b.) Unadjusted Estimates**

|                           | <b>Delta</b>                                                 | <b>Omicron</b> |
|---------------------------|--------------------------------------------------------------|----------------|
|                           | <i>Crude Vaccine effectiveness (95% confidence interval)</i> |                |
| <i>Hospital admission</i> |                                                              |                |
| 2 doses overall           | 80 (75- 84)                                                  | 65 (58- 71)    |
| 2 doses <3 m ago          | 81 (63- 90)                                                  | 65 (45- 77)    |
| 2 doses 3 to 5 m ago      | 86 (75- 92)                                                  | 67 (53- 77)    |
| 2 doses ≥6 m ago          | 75 (65- 81)                                                  | 73 (65- 80)    |
| 2 doses ≥9 months ago     | 84 (76- 89)                                                  | 56 (43- 66)    |
|                           |                                                              |                |
| 3 doses overall           | 92 (89- 94)                                                  | 87 (84- 90)    |

|                                                                     |             |             |
|---------------------------------------------------------------------|-------------|-------------|
| 3 doses <3 m ago                                                    | 93 (90- 95) | 89 (86- 92) |
| 3 doses ≥3 m ago                                                    | 86 (73- 93) | 71 (56- 81) |
| <i>Emergency department admission without admission to hospital</i> |             |             |
| 2 doses overall                                                     | 62 (56-66)  | 47 (40- 53) |
| 2 doses <3 m ago                                                    | 80 (71- 86) | 67 (56- 75) |
| 2 doses 3 to 5 m ago                                                | 60 (51- 68) | 48 (36- 57) |
| 2 doses ≥6 m ago                                                    | 58 (50- 65) | 51 (43- 58) |
| 2 doses ≥9 months ago                                               | 61 (51- 68) | 29 (15- 41) |
| <i>3 doses overall</i>                                              |             |             |
| 3 doses <3 m ago                                                    | 85 (82- 88) | 72 (68- 76) |
| 3 doses ≥3 m ago                                                    | 86 (83- 89) | 75 (71- 79) |
| 3 doses ≥3 m ago                                                    | 78 (67- 85) | 51 (34- 64) |

m = month. Individuals were considered vaccinated with two doses at least seven days after the second dose and vaccinated with three doses at least 14 days after the third dose.

**Supplementary Tables 4a & 3b. Adjusted vaccine effectiveness of Pfizer mRNA COVID-19 vaccine BNT162b2 against hospital and emergency department admission among individuals 18-64 years (4a), and those 65 years and older (4b) with acute respiratory infection, Dec 1, 2021 through Feb 06, 2022**

**a.) 18 to 64 years**

| <b>BNT162b2 effectiveness</b>                                       | <b>Delta</b>                                           | <b>Omicron</b> |
|---------------------------------------------------------------------|--------------------------------------------------------|----------------|
|                                                                     | <i>Vaccine effectiveness (95% confidence interval)</i> |                |
| <i>Hospital admission</i>                                           |                                                        |                |
| 2 doses overall                                                     | 78 (68- 85)                                            | 61 (48- 71)    |
| 2 doses <3 months ago                                               | 81 (55- 92)                                            | 60 (27- 78)    |
| 2 doses 3 to <6 months ago                                          | 90 (78- 95)                                            | 62 (40- 76)    |
| 2 doses 6 to <9 months ago                                          | 77 (64- 86)                                            | 69 (55- 79)    |
| 2 doses ≥9 months ago                                               | 47 (-3- 73)                                            | 27 (-25- 58)   |
| <i>3 doses overall</i>                                              |                                                        |                |
| 3 doses <3 months ago                                               | 84 (72- 91)                                            | 76 (63- 85)    |
| 3 doses ≥3 months ago                                               | 83 (70- 91)                                            | 82 (69- 89)    |
| 3 doses ≥3 months ago                                               | 84 (36- 96)                                            | 38 (-35- 71)   |
| <i>Emergency department admission without admission to hospital</i> |                                                        |                |
| 2 doses overall                                                     | 58 (51- 64)                                            | 45 (36- 52)    |
| 2 doses <3 months ago                                               | 76 (65- 84)                                            | 60 (45- 71)    |
| 2 doses 3 to <6 months ago                                          | 56 (43- 65)                                            | 44 (30- 55)    |
| 2 doses 6 to <9 months ago                                          | 57 (47- 64)                                            | 48 (38- 56)    |
| 2 doses ≥9 months ago                                               | 53 (39- 64)                                            | 26 (6- 42)     |

|                       |             |             |
|-----------------------|-------------|-------------|
| 3 doses overall       | 80 (74- 85) | 70 (63- 76) |
| 3 doses <3 months ago | 80 (74- 85) | 71 (63- 77) |
| 3 doses ≥3 months ago | 77 (59- 87) | 59 (35- 74) |

\*adjusted for age, sex, race/ethnicity, BMI, Charlson comorbidity index, prior SARS-CoV-2 infection

**b.) 65 years and older**

| <b>BNT162b2 effectiveness</b>                                       | <b>Delta</b>                                           | <b>Omicron</b> |
|---------------------------------------------------------------------|--------------------------------------------------------|----------------|
|                                                                     | <i>Vaccine effectiveness (95% confidence interval)</i> |                |
| <i>Hospital admission</i>                                           |                                                        |                |
| 2 doses overall                                                     | 78 (65- 86)                                            | 64 (52- 73)    |
| 2 doses <3 months ago                                               | 69 (2- 90)                                             | 81 (53- 92)    |
| 2 doses 3 to <6 months ago                                          | 80 (44- 93)                                            | 76 (54- 88)    |
| 2 doses 6 to <9 months ago                                          | 67 (39- 82)                                            | 76 (62- 85)    |
| 2 doses ≥9 months ago                                               | 86 (72- 93)                                            | 50 (30- 64)    |
| 3 doses overall                                                     | 91 (84- 95)                                            | 86 (79- 90)    |
| 3 doses <3 months ago                                               | 94 (88- 97)                                            | 88 (82- 92)    |
| 3 doses ≥3 months ago                                               | 70 (28- 87)                                            | 65 (37- 81)    |
| <i>Emergency department admission without admission to hospital</i> |                                                        |                |
| 2 doses overall                                                     | 75 (62- 84)                                            | 59 (44- 70)    |
| 2 doses <3 months ago                                               | 92 (62- 98)                                            | 81 (52- 92)    |
| 2 doses 3 to <6 months ago                                          | 80 (50- 92)                                            | 62 (30- 79)    |
| 2 doses 6 to <9 months ago                                          | 74 (54- 86)                                            | 68 (51- 79)    |
| 2 doses ≥9 months ago                                               | 72 (54- 83)                                            | 49 (27- 65)    |
| 3 doses overall                                                     | 90 (84- 94)                                            | 82 (75- 87)    |
| 3 doses <3 months ago                                               | 92 (87- 95)                                            | 85 (79- 90)    |
| 3 doses ≥3 months ago                                               | 77 (55- 88)                                            | 59 (33- 75)    |

\*adjusted for age, sex, race/ethnicity, BMI, Charlson comorbidity index, prior SARS-CoV-2 infection



**Supplementary Figure 1. Adjusted vaccine effectiveness of Pfizer mRNA COVID-19 vaccine BNT162b2 against hospital and emergency department admission among individuals 18-64 years and those 65 years and older with acute respiratory infection, Dec 1, 2021 through Feb 06, 2022**

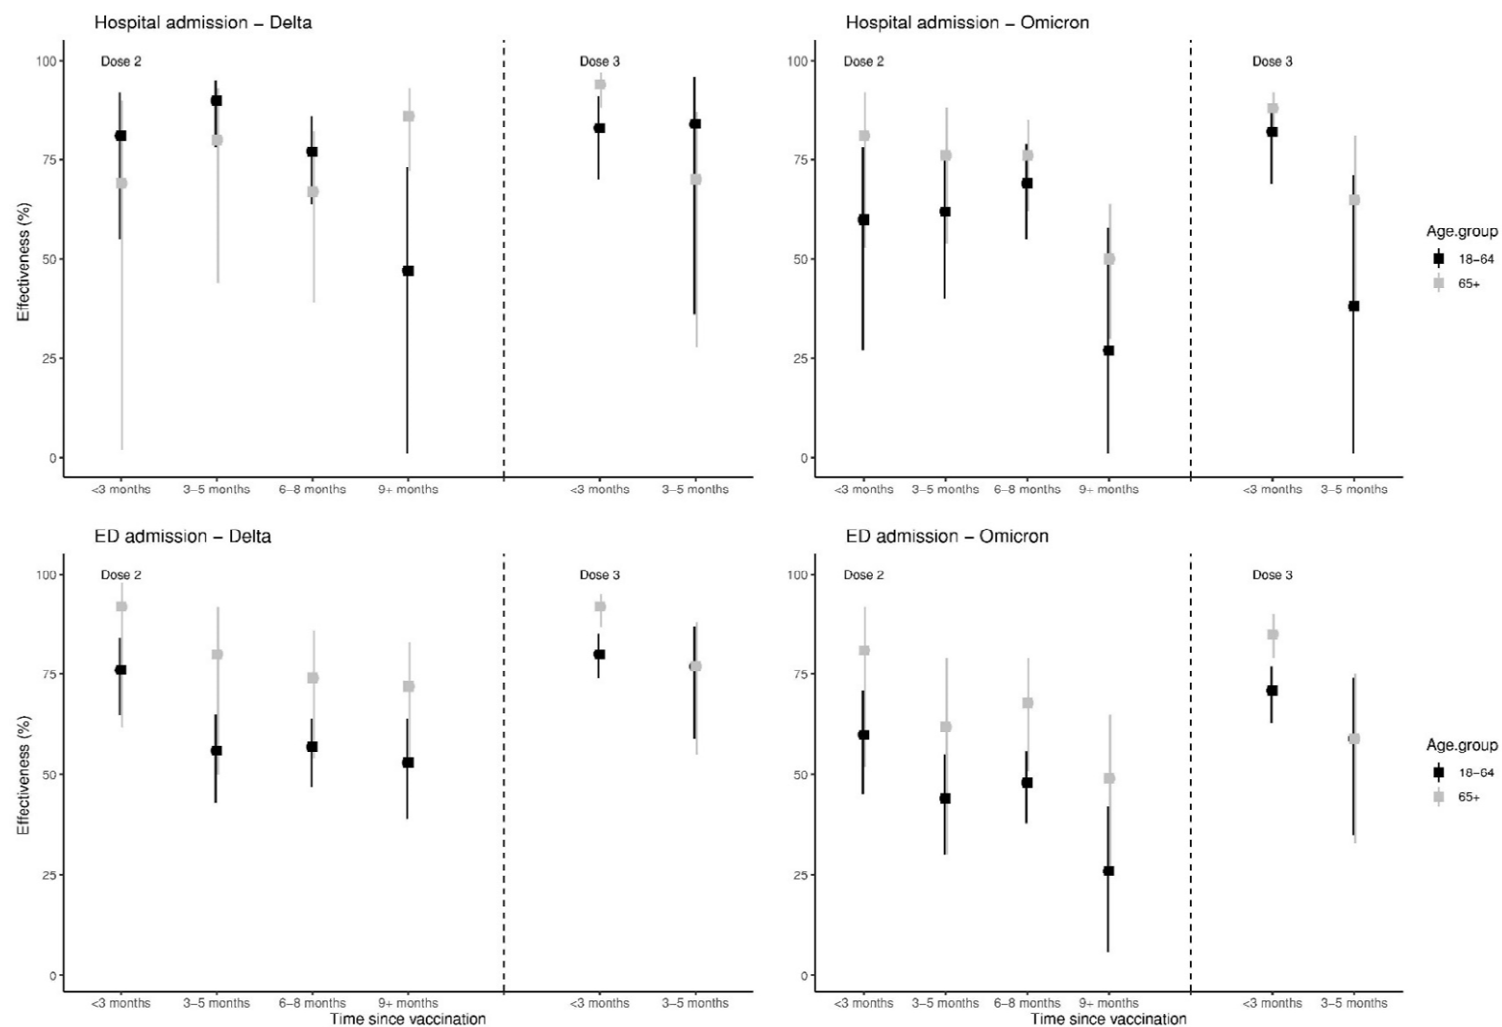

ED= emergency department, estimates adjusted for age, sex, race/ethnicity, BMI, Charlson comorbidity index, prior SARS-CoV-2 infection, prior influenza vaccination, prior pneumococcal vaccination
